# Supplementary material for: Enhanced Photocatalytic Hydrogen Production Activity by Constructing a Robust Organic-Inorganic Hybrid Material Based Fulvalene and TiO2
Source: MDPI journal article supplement (doi:10.3390/nano12111918), 2022-06-03
Supplement: s1 [file s1]

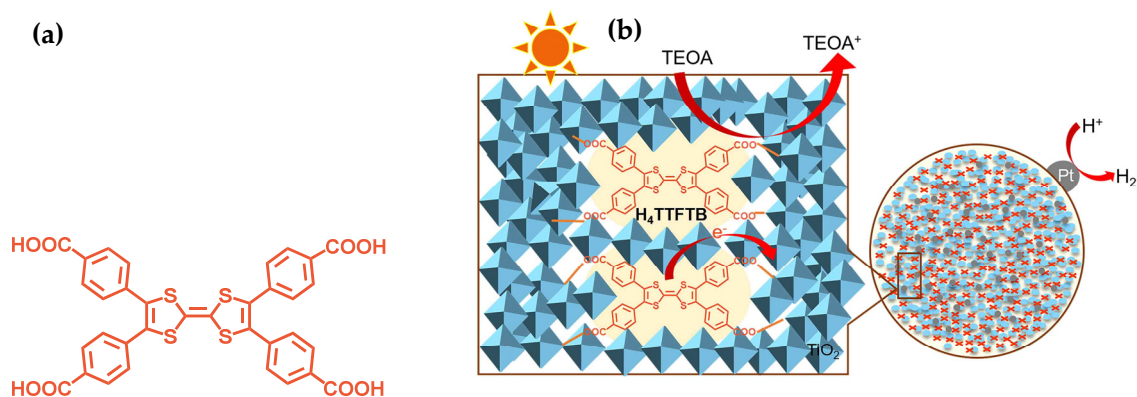

**Figure S1.** (a) The structure of H<sub>4</sub>TTFTB, (b) illustration of the fabrication of the H<sub>4</sub>TTFTB-TiO<sub>2</sub>.

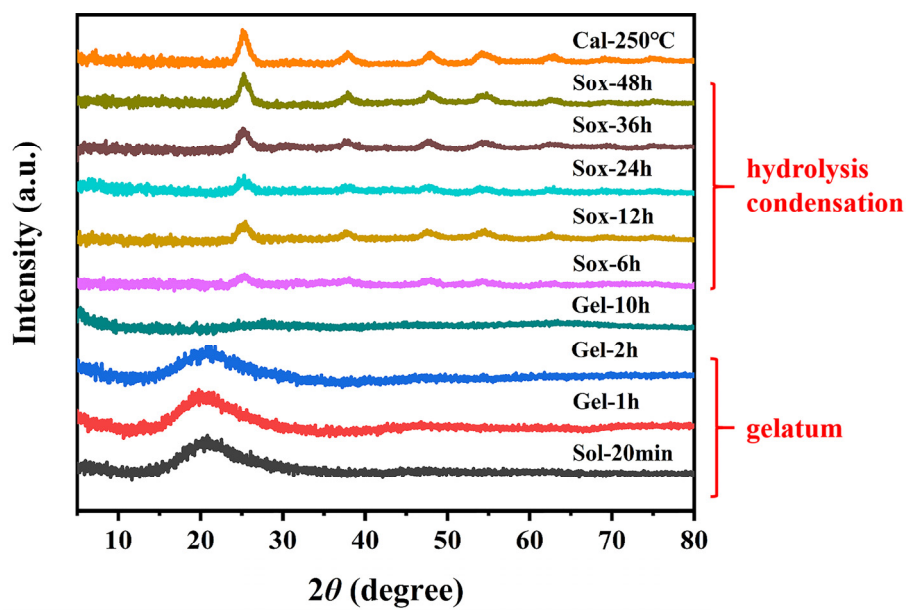

**Figure S2.** The XRD patterns of the intermediate products at different reaction times.

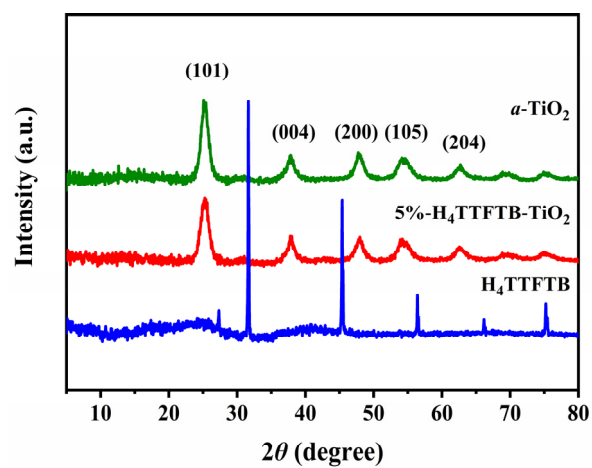

**Figure S3.** The XRD patterns of the  $a$ -TiO<sub>2</sub>, H<sub>4</sub>TTFTB and H<sub>4</sub>TTFTB-TiO<sub>2</sub>-5.0.

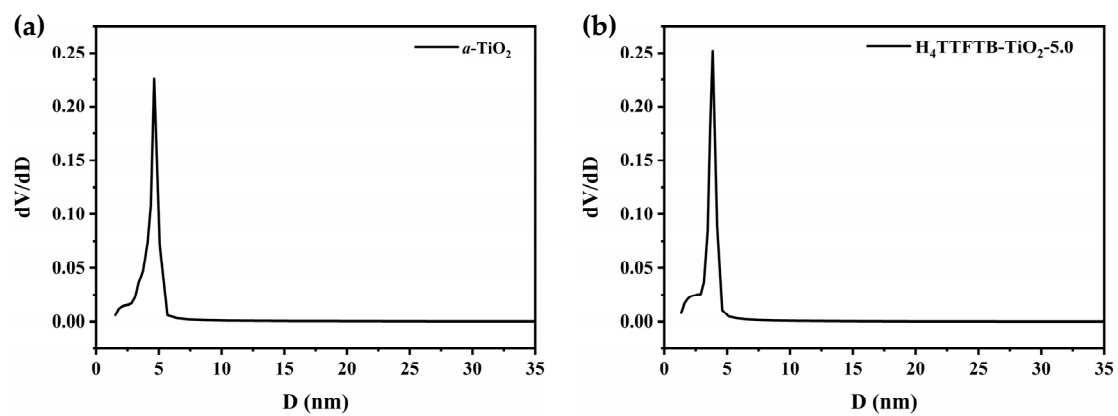

**Figure S4.** The pore size distributions of (a)  $a$ -TiO<sub>2</sub>, (b) H<sub>4</sub>TTFTB-TiO<sub>2</sub>-5.0.

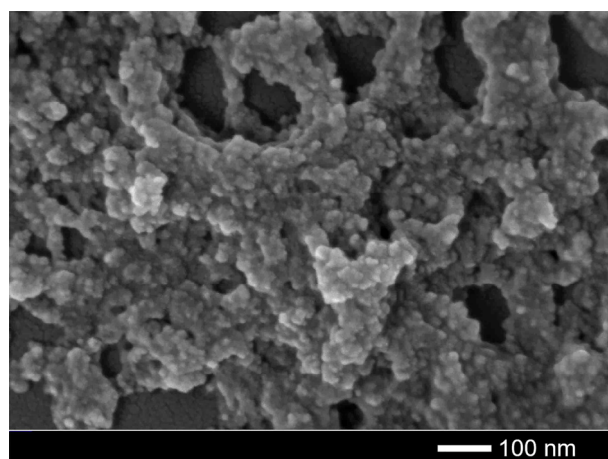

**Figure S5.** The SEM of H<sub>4</sub>TTFTB-TiO<sub>2</sub>-5.0.

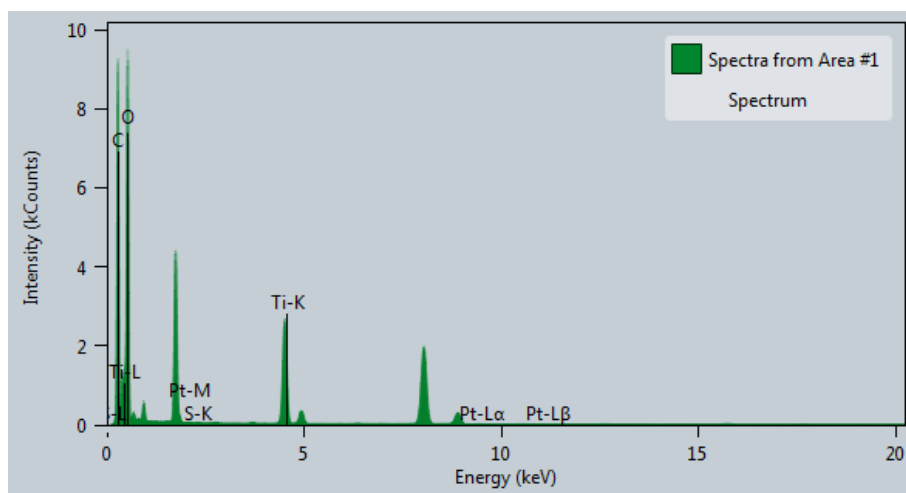

**Figure S6.** EDX of the Pt@H<sub>4</sub>TTFTB-TiO<sub>2</sub>-5.0.

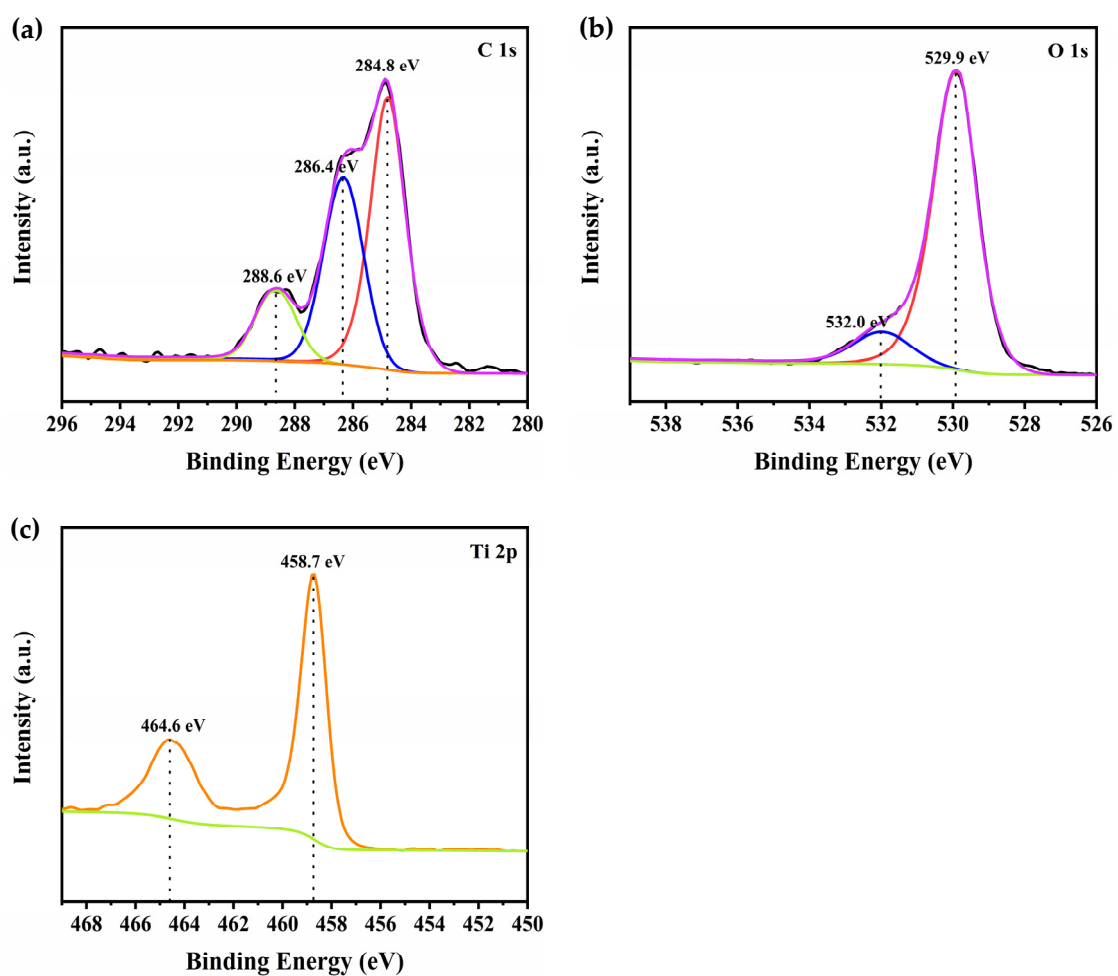

**Figure S7.** X-ray photoelectron spectra of *a*-TiO<sub>2</sub>: (a) C 1s; (b) O 1s and (c) Ti 2p.

Atomic ratio of Ti : O = 35% : 65%  $\approx$  1 : 2.

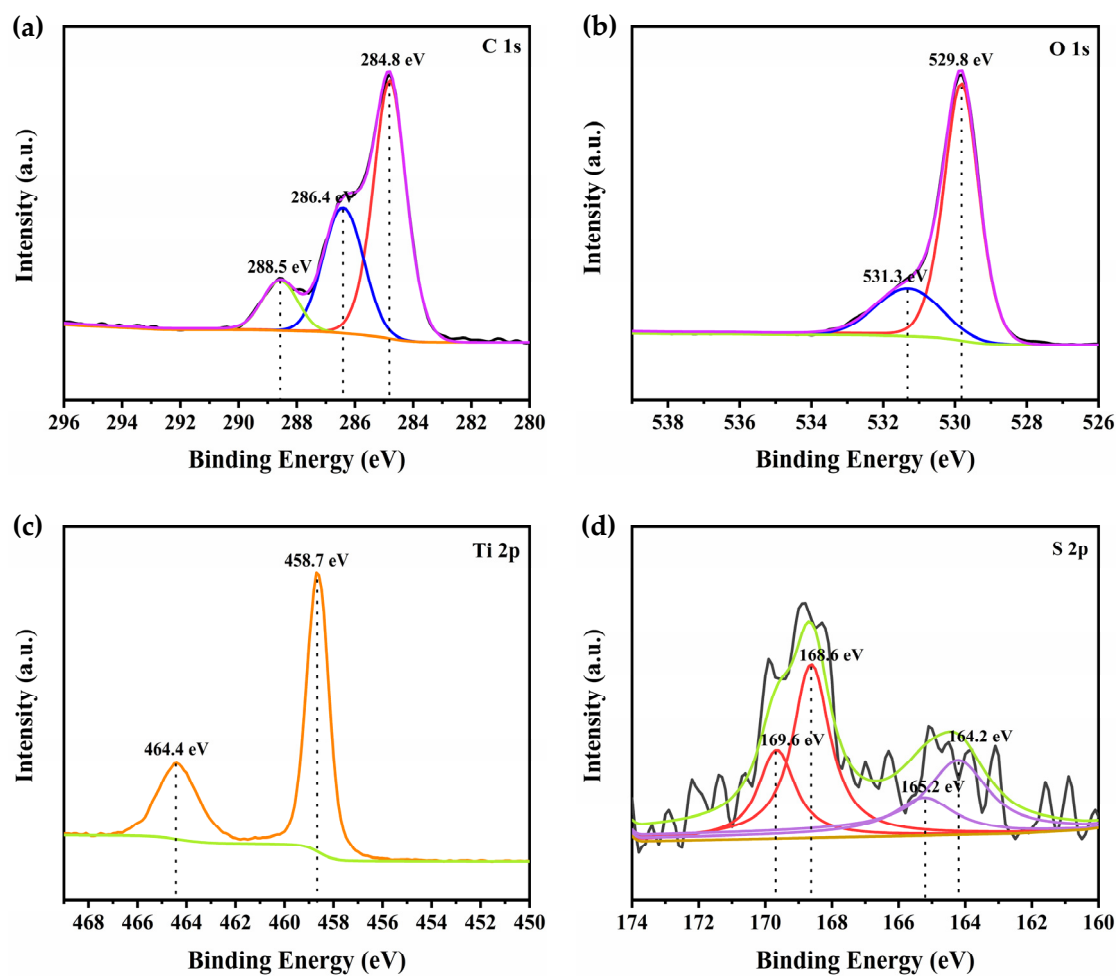

**Figure S8.** X-ray photoelectron spectra for of H<sub>4</sub>TTFTB-TiO<sub>2</sub>-5.0:(a) C 1s; (b) O 1s; (c) Ti 2p and (d) S 2p. Atomic ratio of Ti : O : C : S = 27% : 51% : 21% : 1.18%.

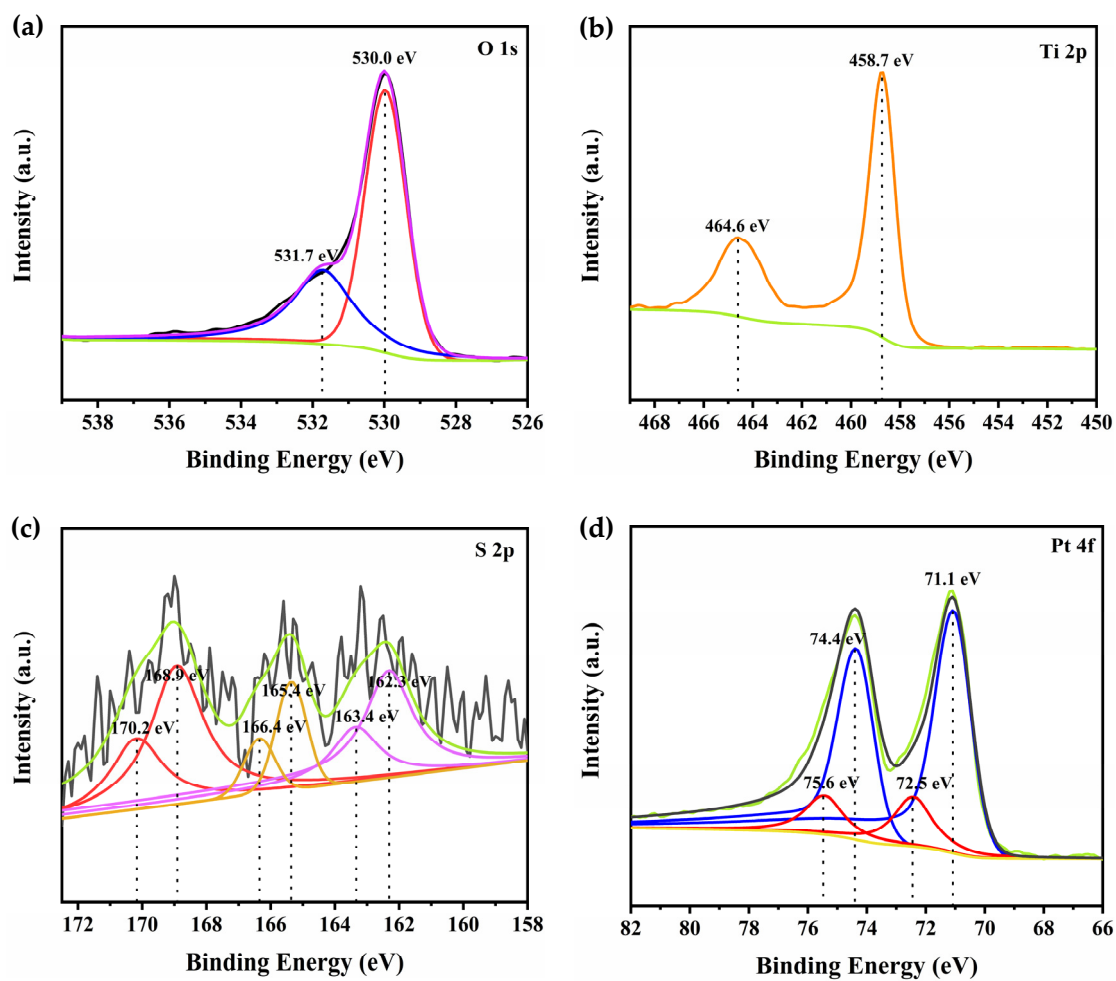

**Figure S9.** X-ray photoelectron spectra of Pt@H<sub>4</sub>TTFTB-TiO<sub>2</sub>-5.0: (a) O 1s; (b) Ti 2p; (c) S 2p and (d) Pt 4f.

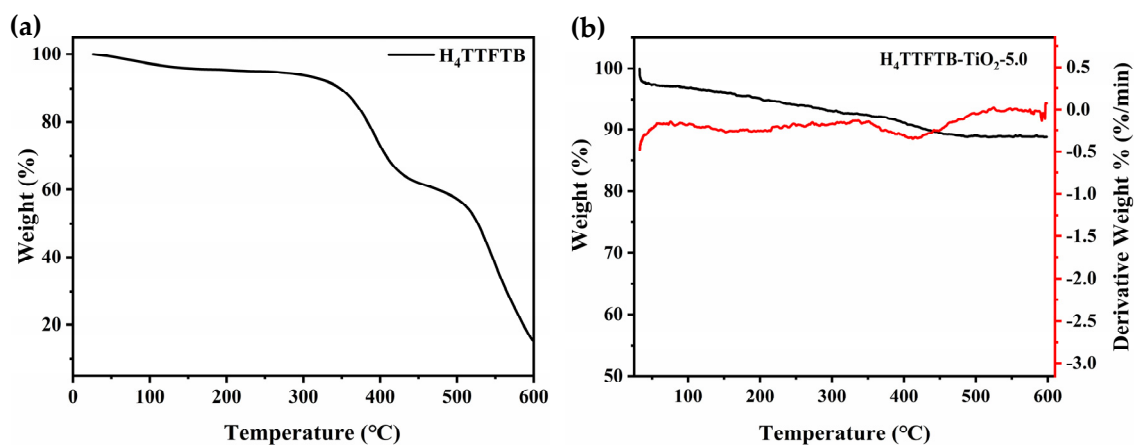

**Figure S10.** Thermogravimetry analysis of (a) H<sub>4</sub>TTFTB compound, (b) H<sub>4</sub>TTFTB-TiO<sub>2</sub>-5.0.

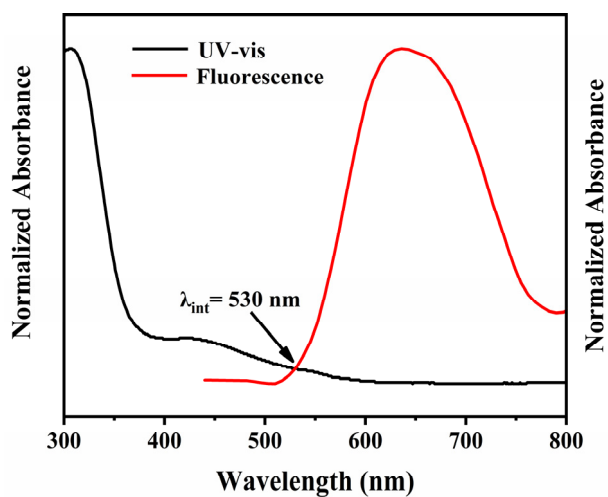

**Figure S11.** UV-vis absorption spectra and photoluminescence spectra of H<sub>4</sub>TTFTB in DMF ( $E_{0-0} = 1240/\lambda_{\text{int}}$ ).

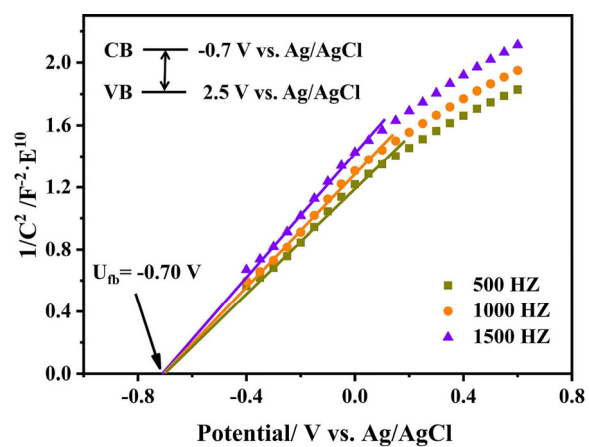

**Figure S12.** Mott-Schottky plot of  $\alpha$ -TiO<sub>2</sub> in 0.5 M Na<sub>2</sub>SO<sub>4</sub> aqueous solution.

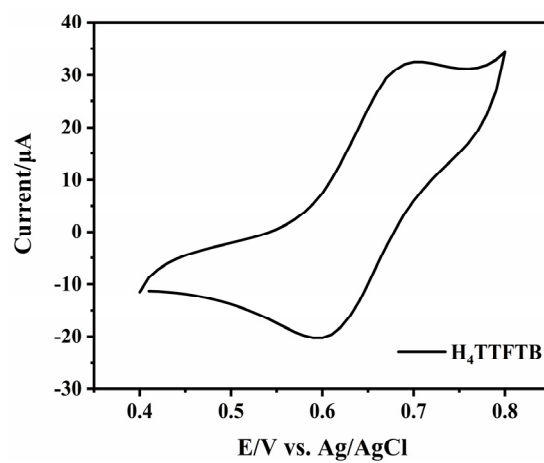

**Figure S13.** Cyclic voltammogram of H<sub>4</sub>TTFTB in 0.1 M TBAPF<sub>6</sub> of DMF solutions measured with a scan rate of 50 mV s<sup>-1</sup>.



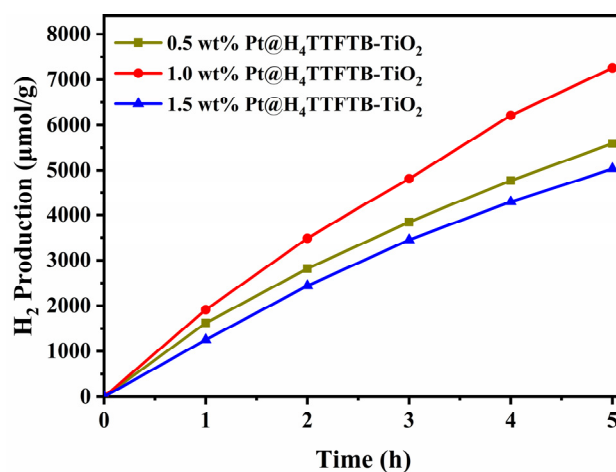

**Figure S14.** Comparison of photocatalytic H<sub>2</sub> evolution of 5 hours of H<sub>4</sub>TTFTB-TiO<sub>2</sub>-5.0 hybrid material under different loads of Pt.

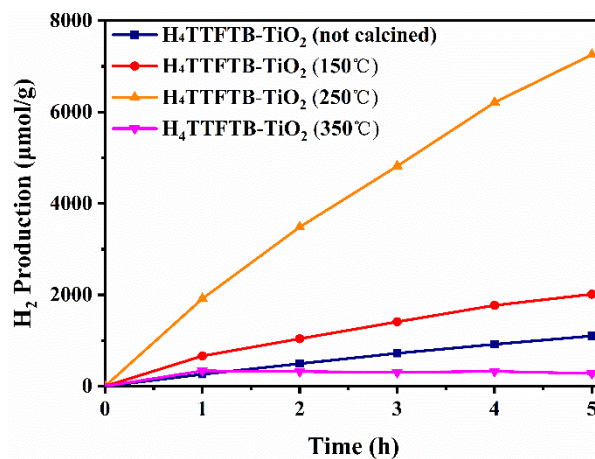

**Figure S15.** Comparison of photocatalytic H<sub>2</sub> evolution of H<sub>4</sub>TTFTB-TiO<sub>2</sub>-5.0 hybrid material under different calcined temperature loaded with 1.0 wt% Pt.

**Table. S1.** The amount of Pt NPs of Pt@H<sub>4</sub>TTFTB-TiO<sub>2</sub>.

| Sample                                           | Pt NPs Loading amount(wt%) |
|--------------------------------------------------|----------------------------|
| 0.5 wt% Pt@H <sub>4</sub> TTFTB-TiO <sub>2</sub> | 0.393                      |
| 1.0 wt% Pt@H <sub>4</sub> TTFTB-TiO <sub>2</sub> | 0.878                      |
| 1.5 wt% Pt@H <sub>4</sub> TTFTB-TiO <sub>2</sub> | 1.288                      |

**Table. S2.** BET surface area, pore volume and pore size of *a*-TiO<sub>2</sub>, H<sub>4</sub>TTFTB-TiO<sub>2</sub>-5.0 derived from 77 K N<sub>2</sub> sorption isother.

| Sample                                     | Surface area (m <sup>2</sup> /g) | Pore size (nm) | Pore volume (cm <sup>3</sup> /g) |
|--------------------------------------------|----------------------------------|----------------|----------------------------------|
| <i>a</i> -TiO <sub>2</sub>                 | 184.10                           | 4.411          | 0.257                            |
| H <sub>4</sub> TTFTB-TiO <sub>2</sub> -5.0 | 212.65                           | 3.630          | 0.239                            |

**Table. S3.** Atomic Fraction of Pt@H<sub>4</sub>TTFTB-TiO<sub>2</sub>.

| Z  | Element | Family | Atomic Fraction (%) | Atomic Error (%) | Mass Fraction (%) | Mass Error (%) | Fit Error (%) |
|----|---------|--------|---------------------|------------------|-------------------|----------------|---------------|
| 6  | C       | K      | 58.16               | 7.63             | 43.36             | 3.48           | 2.79          |
| 8  | O       | K      | 34.35               | 8.16             | 34.12             | 7.29           | 0.55          |
| 16 | S       | K      | 0.01                | 0.00             | 0.02              | 0.01           | 14.70         |
| 22 | Ti      | K      | 7.46                | 1.38             | 22.16             | 3.38           | 0.04          |
| 78 | Pt      | L      | 0.03                | 0.00             | 0.34              | 0.05           | 2.28          |

**Table S4.** Comparison of H<sub>2</sub> evolution activity of TTF and TiO<sub>2</sub> photocatalytic systems.

| Catalyst                                                      | Co-catalyst                     | Sacrificial agent | Solvent               | Light source (nm) | H <sub>2</sub> Production rate ( $\mu$ mol h <sup>-1</sup> g <sup>-1</sup> ) | Ref       |
|---------------------------------------------------------------|---------------------------------|-------------------|-----------------------|-------------------|------------------------------------------------------------------------------|-----------|
| H <sub>4</sub> TTFTB-TiO <sub>2</sub>                         | Pt                              | TEOA              | H <sub>2</sub> O      | >400              | 1452                                                                         | This work |
| Zn-TPY-TTF                                                    | Pt                              | TEA               | H <sub>2</sub> O      | >400              | 14727                                                                        | [45]      |
| G3T3                                                          | Pt                              | TEOA              | H <sub>2</sub> O      | >400              | 24560                                                                        | [19]      |
| DPPCN/TiO <sub>2</sub>                                        | Pt                              | TEOA              | H <sub>2</sub> O      | >400              | 12080                                                                        | [18]      |
| DPPCA/TiO <sub>2</sub>                                        | Pt                              | TEOA              | H <sub>2</sub> O      | >400              | 8400                                                                         | [18]      |
| MOC-16/TTF                                                    | Pd                              | TEOA              | DMSO-H <sub>2</sub> O | >420              | 7344.9                                                                       | [46]      |
| Rh B-Co/TiO <sub>2</sub>                                      | Co                              | -                 | water                 | >400              | 227.3                                                                        | [47]      |
| P42-TiO <sub>2</sub>                                          | Pt                              | TEOA              | H <sub>2</sub> O      | >420              | 745.0                                                                        | [48]      |
| PI-OMe-TiO <sub>2</sub>                                       | Pt                              | TEOA              | H <sub>2</sub> O      | >420              | 1190                                                                         | [26]      |
| 3C/TiO <sub>2</sub>                                           | Pt                              | TEOA              | H <sub>2</sub> O      | >420              | 247                                                                          | [49]      |
| ZnPc/TiO <sub>2</sub>                                         | Pt                              | TEOA              | H <sub>2</sub> O      | >420              | 3448                                                                         | [22]      |
| CoPc/TiO <sub>2</sub>                                         | Pt                              | TEOA              | H <sub>2</sub> O      | >420              | 3328                                                                         | [22]      |
| B-Car/TiO <sub>2</sub>                                        | Pt                              | ascorbic acid     | Water                 | >420              | 249                                                                          | [50]      |
| PAN-Pt@TiO <sub>2</sub>                                       | Pt                              | thioglycolic acid | H <sub>2</sub> O      | >420              | 61.8                                                                         | [51]      |
| Chl-3-TiO <sub>2</sub>                                        | Pt                              | ascorbic acid     | water                 | >400+<br>>600     | 263.3                                                                        | [52]      |
| Eosin Y <sup>+</sup><br>Ni(OH) <sub>2</sub> /TiO <sub>2</sub> | Ni(OH) <sub>2</sub>             | TEOA              | H <sub>2</sub> O      | >420              | 1576                                                                         | [53]      |
| MZ-341/TiO <sub>2</sub>                                       | Cu <sub>2</sub> WS <sub>4</sub> | TEOA              | water                 | >420              | 1406                                                                         | [54]      |
| 1-P25                                                         | Pt                              | TEOA              | water                 | >400              | 2364                                                                         | [55]      |
| FL@MOC-PC                                                     | Pd <sup>2+</sup>                | TEOA              | water                 | >420              | 2402                                                                         | [56]      |
